# Supplementary material for: An Integrated Pipeline for the Genome-Wide Analysis of Transcription Factor Binding Sites from ChIP-Seq
Source: PLOS journal article supplement (doi:10.1371/journal.pone.0016432), 2011-02-16
Supplement: S23 (10.1371/journal.pone.0016432.s023) [file journal.pone.0016432.s023]

|                    | CTCF                                                                                                                    | CTCF – Myf                                                                                                                                |
|--------------------|-------------------------------------------------------------------------------------------------------------------------|-------------------------------------------------------------------------------------------------------------------------------------------|
| Biological process | <ul style="list-style-type: none"> <li>● regulation of apoptosis</li> <li>● regulation of cell communication</li> </ul> | <ul style="list-style-type: none"> <li>● blastocyst development</li> <li>● regulation of cyclase activity</li> </ul>                      |
| Molecular function |                                                                                                                         | <ul style="list-style-type: none"> <li>● growth hormone-releasing hormone receptor activity</li> <li>● protein complex binding</li> </ul> |
